# Supplementary material
Source: HighWire-hosted journal article supplement (https://srh.bmj.com/highwire/filestream/141484/field_highwire_adjunct_files/0/bmjsrh-2020-200970supp001_data_supplement.pdf)

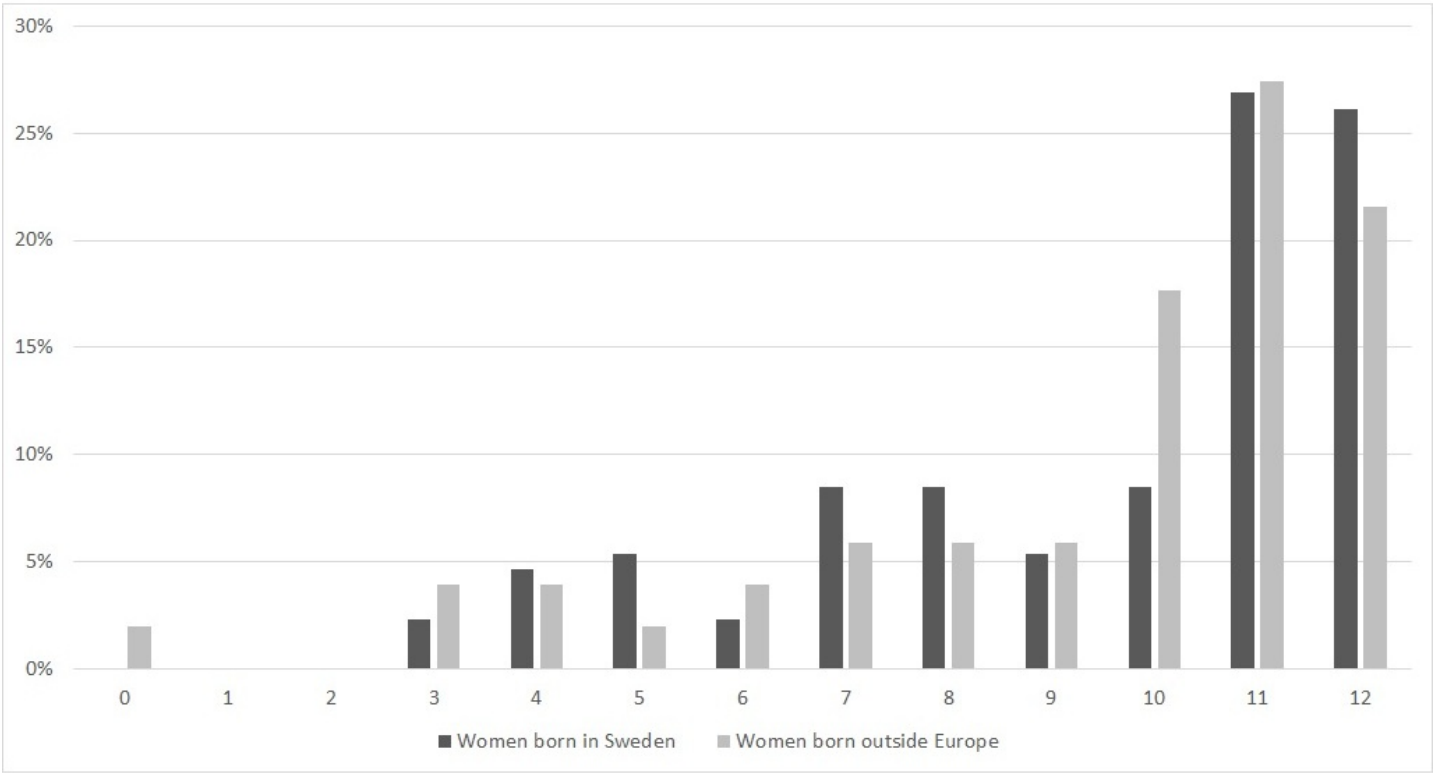

Supplement: bmjsrh-2020-200970supp001_data_supplement.pdf [file bmjsrh-2020-200970supp001_data_supplement.pdf]
